# Supplementary material for: The European Institute of Oncology Thyroid Imaging Reporting and Data System for Classification of Thyroid Nodules: A Prospective Study
Source: MDPI journal article supplement (doi:10.3390/jcm11113238), 2022-06-06
Supplement: s1 [file s1]

## Supplementary Material

**Table S1.** Sensitivity, specificity and diagnostic accuracy according to different cutoff of IEO-TIRADS score.

| Cutoff         | Diagnostic Performance |                       |                       |
|----------------|------------------------|-----------------------|-----------------------|
|                | Sensitivity [95% CI]   | Specificity [95% CI]  | Accuracy [95% CI]     |
| ≥2 (Unlikely)  | 98.9% [96.8% - 100%]   | 16.3% [6.0% - 26.7%]  | 70.0% [62.4% - 77.6%] |
| ≥3 (Doubt)     | 73.6% [64.6% - 82.7%]  | 59.2% [45.4% - 73.0%] | 68.6% [60.9% - 76.3%] |
| ≥4 (Suspected) | 59.3% [49.3% - 69.4%]  | 79.6% [68.3% - 90.9%] | 66.4% [58.6% - 74.3%] |
| ≥5 (Malignant) | 38.5% [28.5% - 48.5%]  | 93.9% [87.2% - 100%]  | 57.9% [49.7% - 66.0%] |

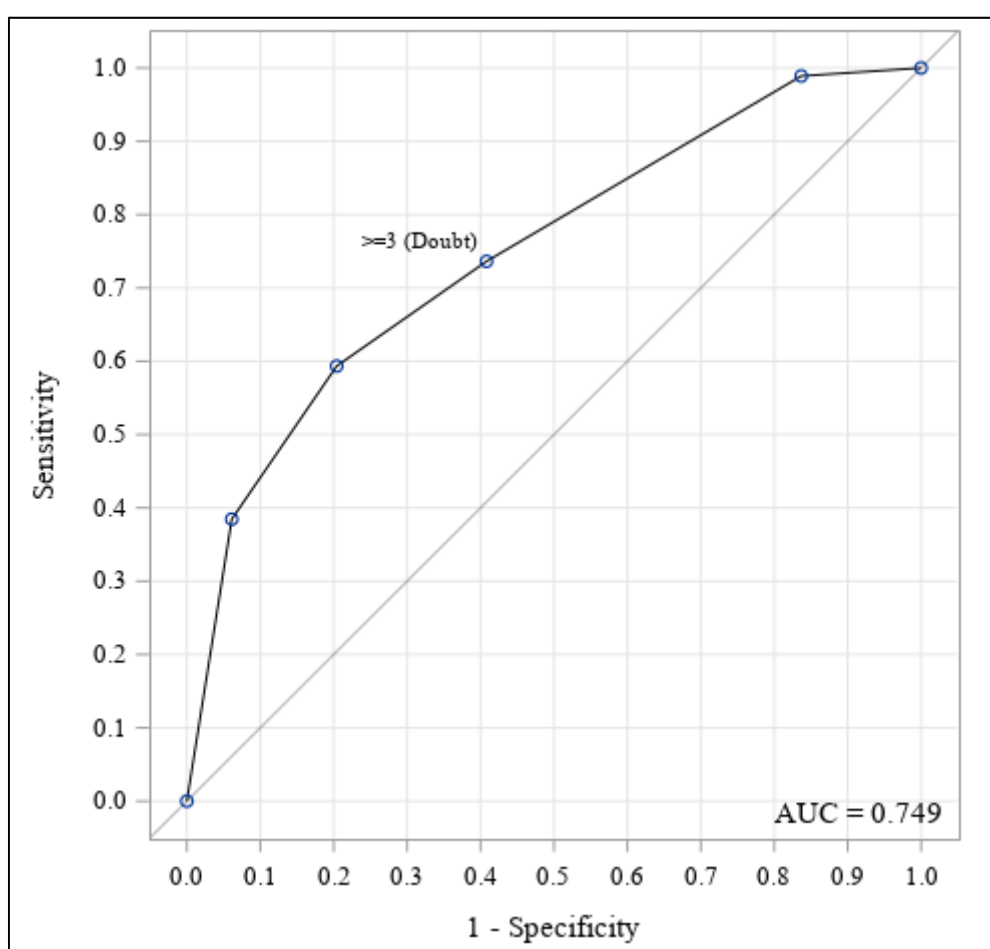

**Figure S1.** ROC curve of the model with IEO-TIRADS score as independent variable and histopathological result (Benign vs. Malignant) as dependent variable.
